# Supplementary material for: The importance of vegetation to understand terrestrial water storage variations
Source: Copernicus journal article supplement (doi:10.5194/hess-2021-394), 2021-08-03
Supplement: Supplementary file [file hess-2021-394-AC1-supplement.pdf]

## Author's response to Referee #2

The authors would like to thank Referee #2 for the comments. We will incorporate all the suggestions in the revised manuscript.

**1) Line 148: Eq.2 should be Eq.3.**

**AC:** Yes, the Referee is right. We will reference the correct equation in the revised manuscript.

**2) Line 230: typo, 'Therefor'.**

**AC:** Thanks for finding the typo. We will correct it.

**3) Line 410: Fig.2 should be Fig.3.**

**AC:** Once again, thank you. We will point to the correct figure in the revision.

**4) Figure 4: please add the label of y axis (numbers of grids?).**

**AC:** Yes, the y-axis of the histograms in Fig. 4 shows the number of grid cells. We will add the label for the y-axis to make it clear.

**5) Line 488: please check the number '69%', I noticed that this number is 61% in Figure 8.**

**AC:** Thanks for pointing this out. We will change accordingly in the revised manuscript, and ensure that such mistakes are not repeated.
